1 ***In Vivo* Efficacy and PK/PD Modeling of KBP-7072, An Aminomethylcycline Antibiotic, in**  
2 **Neutropenic Pneumonia and Thigh Infection Models**

3 Xiaojuan Tan, BS<sup>1</sup>; Min Zhang, MS<sup>1</sup>; Qingmei Liu, MS<sup>1</sup>; Ping Wang, MS<sup>1</sup>; Tian Zhou, MS;<sup>1</sup>

4 Vincent Benn, PhD<sup>2</sup>; Fred Yang, PhD<sup>2</sup>

5 1. KBP Biosciences Co., Ltd., Jinan, China

6 2. KBP Biosciences USA Inc., Princeton, NJ, USA

7  
8 Address correspondence to:

9 Vincent Benn, PhD

10 KBP Biosciences USA Inc.

11 116 Village Blvd, Suite 210

12 Princeton NJ 08540

13 [Vince.benn@kbpbiosciences.com](mailto:Vince.benn@kbpbiosciences.com)

14 Phone: 267-799-6545

15

16 Running title: *In vivo* efficacy of the aminomethylcycline, KBP-7072

17 **ABSTRACT**

18 KBP-7072 is a novel aminomethylcycline with broad-spectrum activity against Gram-positive  
19 and Gram-negative multidrug resistant bacterial isolates and strains. Antibacterial activity and the  
20 PK/PD relationship were assessed using *in vivo* infection models. Six to 8-week-old female CD-  
21 1 mice were randomized to oral KBP-7072, minocycline and vehicle in a *Klebsiella pneumoniae*  
22 murine model, and KBP-7072, linezolid and vehicle for a *Streptococcus pneumoniae* murine  
23 model. Each animal was inoculated with *K. pneumoniae* or *S. pneumoniae* placed on the tip of  
24 the nares. KBP-7072 and antibiotics were started 3 hours post inoculation and continued for 3  
25 days for *K. pneumoniae*, and were started 18 hours post inoculation and continued for 3 days for  
26 *S. pneumoniae*. Animals were euthanized at 0 (control group), 24, 48 or 72 hours post final dose.  
27 *In vivo* efficacy and PK/PD parameters were determined in *Staphylococcus aureus* isolate  
28 (6424MRSA-363), *K. pneumoniae* isolate (6680kpn-522), and *E. coli* isolate (6691eco-558)  
29 murine thigh infection models. *In vivo* efficacy and PK/PD parameters ( $fAUC/MIC$ ,  $fC_{max}/MIC$   
30 and  $\%T > MIC_{free}$ ) were calculated. Respiratory infection occurred in all inoculated mice. KBP-  
31 7072 produced a significant ( $p < 0.05$  to  $< 0.001$ ) dose-dependent decrease in colony forming units  
32 (CFUs) at all doses and a dose-dependent increase in survival rate ( $p < 0.001$  vs. vehicle). The  
33 median survival in all KBP-7072-treated groups was significantly greater vs. comparators  
34 ( $p < 0.001$ ). These results demonstrate potent *in vivo* efficacy for KBP-7072 and determined that  
35 the AUC/MIC parameter was optimal for assessing bacteriostatic and bactericidal effects of  
36 KBP-7072.

37

38

## 39 INTRODUCTION

40 Community-acquired pneumonia (CAP) is the most common infectious diseases leading to  
41 hospitalization and mortality among all age groups, but in particular, the young and the elderly.<sup>1-</sup>  
42 <sup>3</sup> The economic burden of CAP is immense and has been estimated to already exceed \$17 billion  
43 in the U.S. and \$10 billion in Europe.<sup>2,3</sup> Increasing rates of resistance in recent years among  
44 *Streptococcus pneumoniae*, *Haemophilus influenzae*, and other pathogens that are common  
45 etiologic agents for CAP impose additional challenges for providing effective treatment.<sup>4-6</sup>  
46 Increased rates of resistance to macrolides<sup>7</sup> and beta-lactams<sup>8</sup> have been reported among *S.*  
47 *pneumonia* isolates in the SENTRY program. Others have reported increased rates of bacterial  
48 resistance with beta-lactams, fluoroquinolones, macrolides, and earlier generation tetracyclines.<sup>9</sup>  
49 In addition, fluoroquinolone use has been associated with increased risks for tendinitis and  
50 tendon rupture, neurological complications, and hypoglycemia that could limit their use for  
51 treatment of common infections.<sup>10</sup> Increasing rates of resistance and potential side effects with  
52 some antibiotics, together with the substantial morbidity and mortality associated with CAP  
53 emphasize the need for new drugs to add to the treatment armamentarium.

54  
55 KBP-7072 is a novel, semi-synthetic, aminomethylcycline antibiotic, which inhibits the normal  
56 function of the bacterial ribosome. KBP-7072 exhibits a broad spectrum of *in vitro* antibacterial  
57 activity against Gram-positive and Gram-negative bacteria including many multidrug resistant  
58 pathogens. Notably, KBP-7072 is active against many of the bacteria causing CAP, including *S.*  
59 *pneumoniae*, penicillin-resistant *S. pneumoniae* (PRSP), *H. influenzae*, *Staphylococcus aureus*,  
60 methicillin-resistant *S. aureus* (MRSA), vancomycin-resistant enterococcus (VRE),  
61 *Enterobacteriaceae* spp, *Acinetobacter* spp, *Pseudomonas* spp. as well as atypical pathogens

62 including *Mycoplasma pneumoniae*, *Legionella pneumophila*, and *Chlamydia pneumoniae*.<sup>11-12</sup>  
63 Results in healthy volunteers administered single and multiple ascending doses demonstrate that  
64 KBP-7072 may be administered once daily as an oral and intravenous (IV) formulation.<sup>13,14</sup>

65  
66 We report results investigating the *in vivo* bactericidal activity of KBP-7072 against *Klebsiella*  
67 *pneumoniae* and *S. pneumoniae* in a murine pneumonia model and the *in vivo* activity and the  
68 pharmacokinetic/pharmacodynamic (PK/PD) relationship of KBP-7072 in a mouse thigh  
69 infection model.

70

## 71 **RESULTS**

### 72 **Pneumonia Infection Models**

73 Respiratory infection with *K. pneumoniae* occurred in all inoculated mice. Treatment with KBP-  
74 7072 resulted in a significant dose-dependent decrease in CFUs at all doses and most time points  
75 tested. At 72 hours post dose, KBP-7072 150, 300, and 600 mg/kg qd, or 75 and 150 mg/kg bid,  
76 resulted in significant ( $p < 0.05$  to  $< 0.001$ ) reductions in bacterial growth (CFUs) vs. vehicle  
77 (**Table 1 and Figure 1**). Minocycline qd or bid resulted in no significant reduction of bacterial  
78 growth. Treatment with KBP-7072 resulted in a dose-dependent prolonged survival rate (**Figure**  
79 **2**). At doses of 150 and 300 mg/kg, KBP-7072 resulted in a median survival of 3 days compared  
80 to a median survival of 2 days in vehicle-treated animals ( $p < 0.01$  to  $p < 0.001$ ). Minocycline 300  
81 mg/kg resulted in no increase in median survival, and all animals in vehicle and minocycline  
82 groups died by Day 4.

83

84 In the *S. pneumoniae* model at 72 hours post dose, KBP-7072 45 mg/kg qd, or 2.5 and 7.5 mg/kg  
85 bid resulted in no detectable bacteria in the lung and marked lower mean CFUs at 5 and 15  
86 mg/kg doses (**Table 1 and Figure 3**). No significant reduction of bacterial growth occurred with  
87 linezolid 7.5 mg/kg bid, but linezolid 15 mg/kg bid resulted in a significant reduction of the  
88 number of bacteria in lung vs. vehicle ( $p<0.001$ ). KBP-7072 doses of 5 and 15 mg/kg, resulted in  
89 a significant, dose-dependent increases ( $p<0.001$ ) in median survival, and linezolid 7.5 mg/kg  
90 resulted in a significant increase ( $p<0.001$ ) in survival compared to vehicle (**Figure 4**).

91

### 92 **Thigh Infection Model**

93 In the *S. aureus* 6424MRSA-363-induced thigh infection model, KBP-7072 resulted in a dose-  
94 dependent reduction of CFUs (**Table 2**). Compared to vehicle, all doses KBP-7072 produced  
95 significant ( $p<0.001$ ) reductions of CFUs at 24 hours. In the *K. pneumoniae* 6680kpn-522-  
96 induced thigh infection model, KBP-7072 resulted in a dose-dependent reduction in CFUs  
97 (**Table 3**). Compared to vehicle, all doses of KBP-7072 resulted in significant ( $p<0.001$ )  
98 reductions in CFUs. The KBP-7072 10 mg/kg bid group showed better activity than the 20  
99 mg/kg qd group against *K. pneumoniae* 6680kpn-522 ( $p<0.001$ ). Similarly, the 20 mg/kg bid  
100 group showed better activity than the 40 mg/kg qd group ( $p<0.001$ ). In the *E. coli* 6691eco-558-  
101 induced thigh infection model, KBP-7072 resulted in dose-dependent reductions in CFUs (**Table**  
102 **4**). Compared to vehicle, all doses of KBP-7072 resulted in significant ( $p<0.001$ ) reductions in  
103 CFUs. At the once daily dosing schedule, KBP-7072 demonstrated dose dependent reductions in  
104 CFUs.

105

### 106 **Relationship Between Efficacy and PK/PD Parameters of KBP-7072**

107 In the KBP-7072-treated thigh infection models, the relationship between the  $\log_{10}$  CFU change  
108 and the PK/PD parameters (the ratio of the area under the unbound concentration – time curve to  
109 the minimum inhibitory concentration [24-h  $fAUC/MIC$ ], the ratio of the unbound peak plasma  
110 concentration to the MIC [ $fC_{max}/MIC$ ], and the percentage of the dosing interval that the unbound  
111 drug concentration exceeded the MIC [%T>MIC<sub>free</sub>]) was examined. The  $fAUC/MIC$  ratio was  
112 the most predictive PK/PD parameter for the efficacy of KBP-7072 *in vivo* (**Figures 5-7 and**  
113 **Tables 6-8**). The magnitude of the PK/PD parameters associated with each dose was calculated  
114 from the following equation:  $E = E_0 - E_{max} \times (PK \text{ parameter})^N / (EC_{50}^N + (PK \text{ parameter})^N)$ . The  
115 relationship between KBP-7072 MIC and  $fAUC/MIC$  necessary to achieve a static effect, 1  $\log_{10}$   
116 killing, and 2  $\log_{10}$  killing is shown in **Table 5**. As a measure of the *in vivo* efficacy of KBP-  
117 7072 against *S. aureus*, *K. pneumoniae*, and *E. coli* clinical isolates, the mean  $fAUC/MIC$  ratio  
118 was 4.39 for achieving a bacteriostatic effect, and 8.34 and 13.46 for achieving a bactericidal  
119 effect.

120

## 121 **DISCUSSION**

122 Results from the studies reported here demonstrated significant reductions in bacterial growth in  
123 pneumonia infection models. KBP-7072 had greater dose-dependent antibacterial activity  
124 compared to minocycline and significantly increased the survival rate and prolonged median  
125 survival of treated animals in a *K. pneumoniae*-induced murine pneumonia model. Similar results  
126 were observed with KBP-7072 compared to linezolid in a *S. pneumoniae*-induced murine  
127 pneumonia model. The activity and PK/PD relationship of KBP-7072 in a murine thigh infection  
128 model revealed that KBP-7072 resulted in dose-dependent reductions of CFUs, with higher total  
129 doses of KBP-7072 resulting in greater reductions of CFUs. In a MRSA-induced thigh infection

130 model using the same total dose, more frequent dosing of KBP-7072 did not achieve higher  
131 efficacy than once daily dosing, which supports a once daily dosing as the clinical dosing  
132 regimen. In the murine thigh model, the antibacterial activity of KBP-7072 was correlated with  
133 the time-dependent PK/PD parameters,  $fAUC/MIC$  and  $\%T > MIC_{free}$ , although the  $fAUC/MIC$   
134 ratio was the most predictive PK/PD parameter for KBP-7072 for demonstrating *in vivo* activity.  
135 The mean  $fAUC/MIC$  ratio required for achieving a bacteriostatic effect of KBP-7072 was 4.39  
136 and for achieving 1- $\log_{10}$  kill and 2- $\log_{10}$  kill was 8.34 and 13.46, respectively. Previous *in vitro*  
137 studies with KBP-7072 demonstrated  $MIC_{90}$  values  $< 1 \mu g/mL$  across a range of Gram-negative  
138 and Gram-positive pathogens, including multidrug resistant and typical and atypical pathogens  
139 associated with CABP (Huband et al, 2020).<sup>15</sup>

140

141 The efficacy of different classes of antibiotics is most often predicted by time- or dose-dependent  
142 PK/PD parameters. For tetracyclines, time-dependent parameters, i.e.,  $AUC/MIC$ , are most often  
143 predictive of antimicrobial bacteriostatic and bactericidal activity.<sup>16</sup> Results from *in vivo*  
144 infection models with other antibiotics of the tetracycline class demonstrate that the time plasma  
145 concentrations of drug are above the MIC or  $AUC/MIC$  is the optimal PK/PD parameter for  
146 establishing efficacy.<sup>17-23</sup> In a PK/PD evaluation of KBP-7072 in a murine model of pneumonia,  
147 plasma  $AUC/MIC$  values for a 2- $\log_{10}$  kill were 7.2 and 31.4 for *Staphylococcus aureus* and  
148 *Streptococcus pneumoniae* at 24 hours.<sup>24</sup> Peak KBP-7072 concentrations ranged from 0.12 to  
149 25.2 mcg/mL.<sup>24</sup> Epithelial lining fluid (ELF) concentrations with KBP-7072 were 82% to 238%  
150 of plasma concentrations. While blood and ELF levels were not obtained in the pneumonia  
151 models reported here, results from previous studies in thigh infection models allowed calculation

152 of PK/PD parameters for KBP-7072, and results were comparable with those previously  
153 reported.<sup>24</sup>

154  
155 Limitations of these results include that no blood or epithelial lining fluid concentrations were  
156 obtained directly from animals studied. Consequently, PK/PD calculations were based on  
157 previous published work with KBP-7072. Nevertheless, prior PK results and results from *in vivo*  
158 testing reported here were obtained in murine pneumonia models using CD-1 mice. Thus, these  
159 results provide preliminary evidence of an effective dose of KBP-7072 for treating pneumonia  
160 and provide support for further nonclinical and clinical studies to determine the optimal dose of  
161 KBP-7072 for serious infections.

162  
163 KBP-7072 is undergoing clinical development for treating CABP and other serious infections  
164 due to Gram-positive and Gram-negative aerobes including many multidrug resistant pathogens.  
165 Results from these studies of two different *in vivo* models of infection across multiple pathogens  
166 support once daily administration of KBP-7072 and are consistent with findings from single and  
167 multiple dose studies of KBP-7072 in healthy volunteers where the elimination half-life  
168 exceeded 24 hours.<sup>13,14</sup> These results together with results from *in vitro* studies of  
169 microbiological activity suggest that KBP-7072 is a promising antibiotic with the potential to  
170 expand the armamentarium of drugs available to treat serious infections, especially in an era of  
171 growing bacterial resistance to antimicrobials.

172

## 173 **METHODS**

174 All *in vivo* studies were conducted under appropriate Institutional Animal Care and Use



175 Committee-approved protocols and in accordance with under KBP BioSciences Institutional  
176 Animal Care and Use Committee guidelines. Animals were 6-8-week-old female CD-1 mice, 23  
177 - 27 g obtained from Beijing Vital River Laboratory Animal Technology Co. Limited and housed  
178 in a segregated pathogen-free room under controlled temperature, humidity, airflow, and lighting  
179 conditions.

180

### 181 **Pneumonia Infection Models**

182 For the pneumonia infection model, animals were randomized to treatment groups (15 per group)  
183 based on body weight. After randomization, animals were rendered neutropenic with  
184 intraperitoneal (ip) cyclophosphamide 150 mg/kg at Day -4 and Day -1, then anesthetized with  
185 6.5% pentobarbital sodium 65 mg/kg ip. Each animal, under light anesthesia, was inoculated  
186 with 50  $\mu$ L of a log phase culture of *K. pneumoniae* 5615kpn-493 or *S. pneumoniae* 6962spn-310  
187 placed on the tip of the nares. The second subculture of *S. pneumoniae* 6962spn-310 strains was  
188 prepared less than 20 hours before inoculation. Prior to inoculation, a suspension of  $10^8$  CFU of  
189 *S. pneumoniae* per mL was prepared in Mueller-Hinton (MH) broth (including 10% bovine  
190 serum) by adjusting to a 2.5 McFarland turbidity standard. Final inoculum densities (CFU per  
191 milliliter) were confirmed by serial dilution and culture of each inoculum.

192

193 For the *K. pneumoniae* model, *in vitro* activity (MIC) against a minocycline- and tetracycline-  
194 resistant strain of *K. pneumoniae* was 1, 4, and 8  $\mu$ g/mL for KBP-7072, minocycline, and  
195 tetracycline, respectively, using CLSI standards.<sup>25,26</sup> For the *S. pneumoniae* model, *in vitro*  
196 activity (MIC) against a minocycline- and tetracycline-resistant strain of *S. pneumoniae* was  
197 0.03, 1, 8, and  $>16$   $\mu$ g/mL for KBP-7072, linezolid, minocycline, and tetracycline, respectively.

198

199 For the *K. pneumoniae* model, animals were dosed with oral KBP-7072 150, 300, and 600 mg/kg  
200 qd or 75 or 150 mg/kg bid; oral minocycline 300 mg/kg qd; or oral vehicle 0.2 mL qd. KBP-  
201 7072 and comparator antibiotics were started 3 hours post inoculation and continued for 3 days.

202 For the *S. pneumoniae* model, animals received oral KBP-7072 at doses of 5, 15, or 45 mg/kg, qd  
203 or 2.5 or 7.5 mg/kg, bid; oral linezolid 7.5 or 15 mg/kg, bid; and oral vehicle 0.2 mL, qd. Fifteen  
204 mice were assigned to each dose group. KBP-7072 and comparator antibiotics were started 18  
205 hours post inoculation and continued for 3 days. Treatment groups were fasted 12 hours before  
206 the initiation of dosing. Food was provided 1 hour after the initiation of the dosing. Mice in the  
207 bid treatment groups were also fasted 8 hours before the second dosing, and the feeding was  
208 resumed 1 hour after dosing. Mice had free access to water throughout the study.

209

210 One group of animals was euthanized at 0 (control group), 24, 48 or 72 hours post final dose.

211 The lungs from 6 mice in each group were harvested, homogenized in saline, and serial dilutions  
212 of the homogenates were cultured overnight on a MH agar plate. Bacterial CFUs were presented  
213 as  $\log_{10}$ CFU/lung. For a second group of animals, cumulative survival rate after 72 hours of  
214 therapy was assessed for 10 days post-infection.

215

216 Data on the bacterial colony count of the lungs was analyzed using one-way analysis of variance  
217 (ANOVA) followed by Tukey's Multiple Comparison Test. The survival rate was analyzed by  
218 Log Rank Test with comparisons to the vehicle group at same time point.

219

220 **Thigh Infection Model**

221 KBP-7072 *in vivo* activity was tested on three clinical bacteria isolates collected from Chinese  
222 hospitals in a murine thigh infection model: one MRSA isolate (6424MRSA-363), one *K.*  
223 *pneumoniae* isolate (6680kpn-522), and one *E. coli* isolate (6691eco-558). The *in vitro* activity  
224 of KBP-7072 vs. minocycline was determined for each of the 3 isolates using CLSI  
225 standards.<sup>25,26</sup>

226  
227 To compromise the immune system, mice were injected ip with cyclophosphamide 150 mg/kg  
228 (10 mL/kg of 15 mg/mL stock solution) on Day 4 before bacteria inoculation and 100 mg/kg (10  
229 mL/kg of 10 mg/mL stock solution) on Day 1 before bacteria inoculation. Two hours prior to the  
230 initiation of antimicrobial therapy, each thigh of the neutropenic mouse was inoculated  
231 intramuscularly with a 0.1 mL solution containing approximately  $10^6$  CFU/thigh of the test  
232 isolate prepared from a fresh subculture.

233  
234 Two hours post infection; mice were treated subcutaneously based on the body weight with  
235 KBP-7072 or vehicle. For *S. aureus*, mice (n=3/group) were randomized to vehicle or KBP-7072  
236 10 mg/kg qd, bid, tid or qid; 20 mg/kg qd or bid; or 40 mg/kg qd. For *K. pneumoniae*, mice  
237 received vehicle or KBP-7072 doses of 10 mg/kg qd or bid; 15 mg/kg bid; 20 mg/kg qd or bid;  
238 30 mg/kg qd; or 40 mg/kg qd or bid. For *E. coli*, mice received vehicle or KBP-7072 doses of 15  
239 mg/kg qd or tid; 20 mg/kg qid; 30 mg/kg qd, bid or qid; 40 mg/kg qd or tid; or 50 mg/kg qd.

240  
241 At 24 hours post initial dose, mice were euthanized by CO<sub>2</sub> exposure and followed by cervical  
242 dislocation. Thighs were cleaned with 70% ethanol, skins were removed and infected muscles  
243 from knee to hip joint were harvested under sterile condition. Each muscle was mixed with 5 mL

244 saline and was homogenized at 20,000 rpm. The homogenates were serially diluted, and 50  $\mu$ L of  
245 three different serial diluted homogenates of each thigh were placed on MH agar plates at 35°C  
246 for 18 hours for CFU determination. One group of three mice was harvested at 0 hour to serve as  
247 the baseline control group.

248

249 Activity, defined as the change in bacterial density, was calculated as the  $\log_{10}$  change of  
250 bacterial CFU per thigh:  $\text{Log}_{10}$  change of CFU per thigh =  $\text{Log}_{10}$  CFU of treated group -  $\log_{10}$   
251 CFU of the baseline control group. To evaluate the PK/PD relationship of KBP-7072 in the *in*  
252 *vivo* disease model, data were used from a study of KBP-7072 conducted in cyclophosphamide-  
253 induced neutropenic CD-1 mice after a single subcutaneous injection of KBP-7072 doses of 60,  
254 40, 20, 10, 5, and 2.5 mg/kg, respectively to establish PK parameters.<sup>27</sup>

255

256 Efficacy ( $\log_{10}$ CFU change/thigh) was measured by the arithmetic mean change in  $\log_{10}$ CFU per  
257 thigh of the 24 hours control or treatment groups from the 0-h baseline control mouse (2 hours  
258 after inoculation). PK/PD parameters  $fAUC/MIC$ ,  $fC_{max}/MIC$ , and  $\%T > MIC_{free}$  were calculated  
259 by the WinNonlin Phoenix 6.1.0 software, using PK data, plasma protein binding, and MIC  
260 values.<sup>27</sup> The diagram of efficacy ( $\log_{10}$ CFU change/thigh as ordinate) and PK/PD parameters  
261 ( $fAUC/MIC$ ,  $fC_{max}/MIC$ , and  $\%T > MIC_{free}$  as abscissa) was plotted. The magnitude of the PK/PD  
262 parameters associated with each dose was calculated from the following equation:  $E = E_0 -$   
263  $E_{max} \times (\text{PK parameter})^N / (EC_{50}^N + (\text{PK parameter})^N)$ ,<sup>28</sup> and PK/PD parameters were calculated when  
264 efficacy was static effect, 1 and 2  $\log_{10}$  reductions in colony counts compared to the numbers at  
265 the start of therapy.

266 **ACKNOWLEDGEMENT**

267 The authors would like to acknowledge the editorial assistance of Richard S. Perry, PharmD in  
268 the development of this manuscript, which was supported by KBP Biosciences, USA Inc.,  
269 Princeton, NJ.

270

271 **Financial Support**

272 This work was supported by KBP Biosciences Co. Ltd., Jinan, China.

273

274 **Author Contributions**

275 All authors contributed to data analysis and interpretation, reviewed the manuscript for  
276 intellectual content, and approval submission of the manuscript.

277

278 **Disclosures**

279 Authors were paid employees of KBP Biosciences USA Inc., Princeton, NJ (VB, FY) or KBP  
280 Biosciences Co., Ltd., Jinan, China.

281

282 **REFERENCES**

- 283 1. Violi F, Cangemi R, Falcone M, Taliani G, Pieralli F, Vannucchi V, Nozzoli C, Venditti M,  
284 Chirinos JA, Corrales-Medina VF; SIXTUS (Thrombosis-Related Extrapulmonary Outcomes  
285 in Pneumonia) Study Group. 2017. Cardiovascular complications and short-term mortality  
286 risk in community-acquired pneumonia. *Clin Infect Dis* 64:1486-1493.
- 287 2. File TM Jr, Marrie TJ. Burden of community-acquired pneumonia in North American adults.  
288 *Postgrad Med*. 2010;122:130-41.
- 289 3. Welte T, Torres A, Nathwani D. 2012. Clinical and economic burden of community-acquired  
290 pneumonia among adults in Europe. *Thorax* 67:71-79.
- 291 4. Centers for Disease Control and Prevention. Antibiotic Resistance Threats in the United  
292 States, 2013. Antibiotic/ antimicrobial resistance. Available at: [https://www.cdc.gov/  
293 drugresistance/index.html](https://www.cdc.gov/drugresistance/index.html). Accessed July 18, 2018.
- 294 5. World Health Organization. 2014. Antimicrobial Resistance. Global Report on Surveillance  
295 2014. [http://www.who.int/drugresistance/documents/surveillancereport/en/  
296](http://www.who.int/drugresistance/documents/surveillancereport/en/)
- 296 6. World Health Organization. Statement. 2017. Global priority list of antibiotic-resistant  
297 bacteria to guide research, discovery, and development of new antibiotics, 2017.  
298 <http://apps.who.int/medicinedocs/documents/s23171en/s23171en.pdf>
- 299 7. Sader HS, Flamm RK, Streit JM, Carvalhaes CG, Mendes RE. 2018. Antimicrobial activity  
300 of ceftaroline and comparator agents tested against organisms isolated from patients with  
301 community-acquired bacterial pneumonia in Europe, Asia, and Latin America. *Int J Infect  
302 Dis* 77:82-86.
- 303 8. Jones RN, Sader HS, Mendes RE, Flamm RK. 2013. Update on antimicrobial susceptibility  
304 trends among *Streptococcus pneumoniae* in the United States: report of ceftaroline activity

- 305 from the SENTRY Antimicrobial Surveillance Program (1998-2011). *Diagn Microbiol Infect*  
306 *Dis* 75:107–109.
- 307 9. Cilloniz C, Cardozo C, Garcia-Vidal C. Epidemiology, pathophysiology, and microbiology  
308 of community-acquired pneumonia. *Ann Res Hosp*. 2018;2:1.
- 309 10. Lodise T, Corey R, Hooper D, Cammarata S. 2018. Safety of delafloxacin: Focus on adverse  
310 events of special interest. *Open Forum Infect Dis*. 5(10):ofy220. doi: 10.1093/ofid/ofy220.
- 311 11. Benn V, Wang Y, Liu Q, Hong M, Yang F. 2017. Antimicrobial activity of KBP-7072  
312 against *Acinetobacter* and *Stenotrophomonas Maltophilia*. Poster #12 presented at ASM  
313 Microbe, New Orleans, LA.
- 314 12. Wang YL, Liu QM, Zhang B. 2016. Antibacterial activity of KBP-7072 against clinical  
315 isolates of drug-resistant bacteria. Poster #553 presented at ASM Microbe, Boston, MA.
- 316 13. Yang F, Wang Y, Wang P, Hong M, Benn V. 2017. Multiple ascending dose safety,  
317 tolerability, and pharmacokinetics of KBP-7072, a novel third generation tetracycline  
318 aminomethylcycline. *Open Forum Infect Dis*. 4(Suppl 1):S291
- 319 14. Zhang B, Wang Y, Chen Y, Yang F. 1996. Single ascending dose safety, tolerability, and  
320 pharmacokinetics of KBP-7072, a novel third generation tetracycline. *Open Forum Infect*  
321 *Dis*. 3(Suppl 1):1996.
- 322 15. Huband MD, Mendes RE, Pfaller MA, Lindley JM, Strand GJ, Benn VJ, Zhang J, Li L,  
323 Zhang M, Tan X, Liu Q, Flamm RK. In vitro activity of KBP-7072, a novel third-generation  
324 tetracycline, against 531 recent geographically diverse and molecularly characterized  
325 *Acinetobacter baumannii* species complex isolates. *Antimicrob Agents Chemother*. 2020 Feb  
326 18. pii: AAC.02375-19. doi: 10.1128/AAC.02375-19.

- 327 16. Agwuh KN, MacGowan A. 2006. Pharmacokinetics and pharmacodynamics of the  
328 tetracyclines including glycyclines. *J Antimicrob Chemother* 58:256–265.
- 329 17. Christianson J, Andes D, Craig W. 2001. Magnitude of the 24-h AUC/MIC required for  
330 efficacy of doxycycline (DOXY) against *Streptococcus pneumoniae* (SP) in a murine thigh-  
331 infection model. *Clin Infect Dis* 33:1169.
- 332 18. Crandon JL, Banevicius MA, Nicolau DP. 2009. Pharmacodynamics of tigecycline against  
333 phenotypically diverse *Staphylococcus aureus* isolates in a murine thigh model. *Antimicrob*  
334 *Agents Chemother* 53:1165–1169.
- 335 19. Koomanachai P, Crandon JL, Banevicius MA, Peng L, Nicolau DP. 2009. Pharmacodynamic  
336 profile of tigecycline against methicillin-resistant *Staphylococcus aureus* in an experimental  
337 pneumonia model. *Antimicrob Agents Chemother* 53:5060–5063.
- 338 20. Lepak AJ, Zhao M, Marchillo K, VanHecker J, Andes DR. 2017. *In vivo* pharmacodynamic  
339 evaluation of omadacycline (PTK 0796) against *Streptococcus pneumoniae* in the murine  
340 pneumonia model. *Antimicrob Agents Chemother* 61. pii: e02368-16. doi:  
341 10.1128/AAC.02368-16.
- 342 21. Nicasio AM, Crandon JL, Nicolau DP. 2009. *In vivo* pharmacodynamic profile of tigecycline  
343 against phenotypically diverse *Escherichia coli* and *Klebsiella pneumoniae* isolates.  
344 *Antimicrob Agents Chemother* 53:2756–2761.
- 345 22. van Ogtrop ML, Andes D, Stamstad TJ, Conklin B, Weiss WJ, Craig WA, Vesga O. 2000. *In*  
346 *vivo* pharmacodynamic activities of two glycyclines (GAR-936 and WAY 152,288)  
347 against various gram-positive and gram negative bacteria. *Antimicrob Agents Chemother*  
348 44:943–949.



- 349 23. Zhao M, Lepak AJ, Marchillo K, VanHecker J, Andes DR. 2017. *In vivo* pharmacodynamic  
350 target assessment of eravacycline against *Escherichia coli* in a murine thigh infection model.  
351 Antimicrob Agents Chemother 61. pii: e00250-17. doi: 10.1128/AAC.00250-17.
- 352 24. Lepak AJ, Zhao M, Liu Q, Wang P, Wang Y, Bader JC, Ambrose PG, Andes DR.  
353 Pharmacokinetic/pharmacodynamic evaluation of a novel aminomethylcycline antibiotic,  
354 KBP-7072, in the neutropenic murine pneumonia model against *Staphylococcus aureus* and  
355 *Streptococcus pneumoniae*. Antimicrob Agents Chemother. 2019;63(3). pii: e02404-18. doi:  
356 10.1128/AAC.02404-18.
- 357 25. Clinical and Laboratory Standards Institute. 2015. Methods for Dilution Antimicrobial  
358 Susceptibility Tests for Bacteria That Grow Aerobically; Approved Standard—Tenth  
359 Edition, in CLSI document M07-A10: Clinical Laboratory Standards Institute, 940 West  
360 Valley Road, Suite 1400, Wayne, Pennsylvania 19087-1898 USA.
- 361 26. Clinical and Laboratory Standards Institute. 2016. Performance Standards for Antimicrobial  
362 Susceptibility Testing; Twenty-Sixth Informational Supplement, in CLSI document M100S.  
363 Clinical Laboratory Standards Institute, 940 West Valley Road, Suite 1400, Wayne,  
364 Pennsylvania 19087-1898 USA.
- 365 27. Tan X, Zhang M, Liu Q, Wang P, Zhou T, Zhu Y, Chen B, Wang M, Xia Y, Benn V, Yang  
366 F, Zhang J. Nonclinical pharmacokinetics, protein binding, and elimination of KBP-7072, an  
367 aminomethylcycline antibiotic in animal models. Antimicrob Agents Chemother. 2020 in  
368 press.
- 369 28. Andes D, Craig WA. 2002. Animal model pharmacokinetics and pharmacodynamics: a  
370 critical review. Int J Antimicrob Agents 19:261-268.  
371

372 Figure 1. Efficacy of KBP-7072 in mouse pneumonia model infected by intranasal inoculation of  
373 *Klebsiella pneumoniae*. A. Colony forming unit in animals treated by KBP-7072 dosed once  
374 daily. B. Colony forming unit in animals treated by KBP-7072 dosed bid. (\* p<0.05; \*\* p< 0.01;  
375 \*\*\* p<0.001).

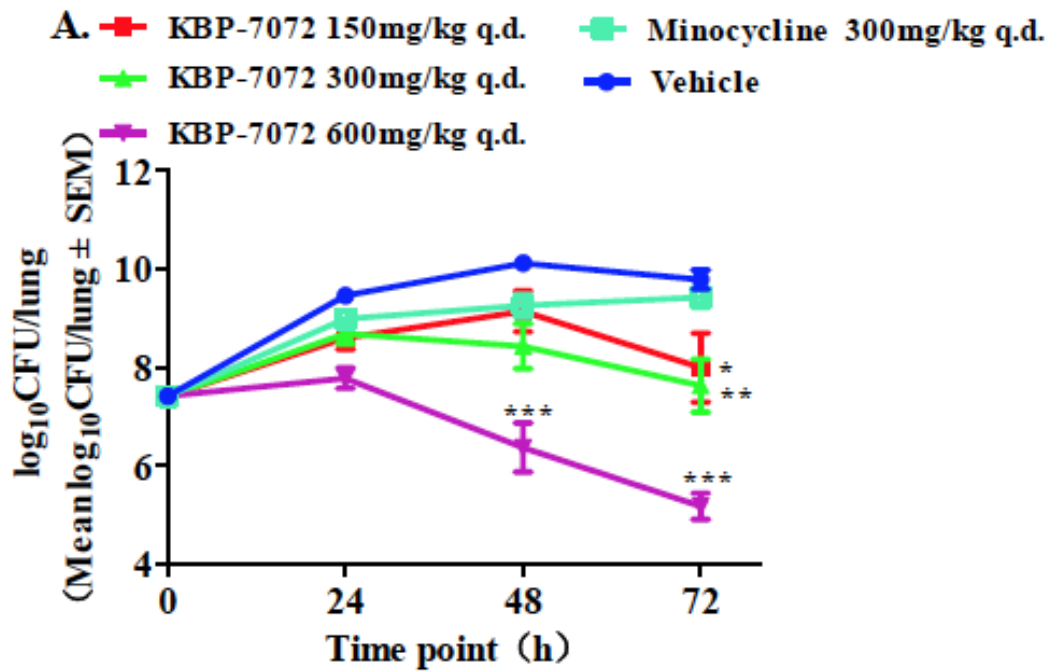

376

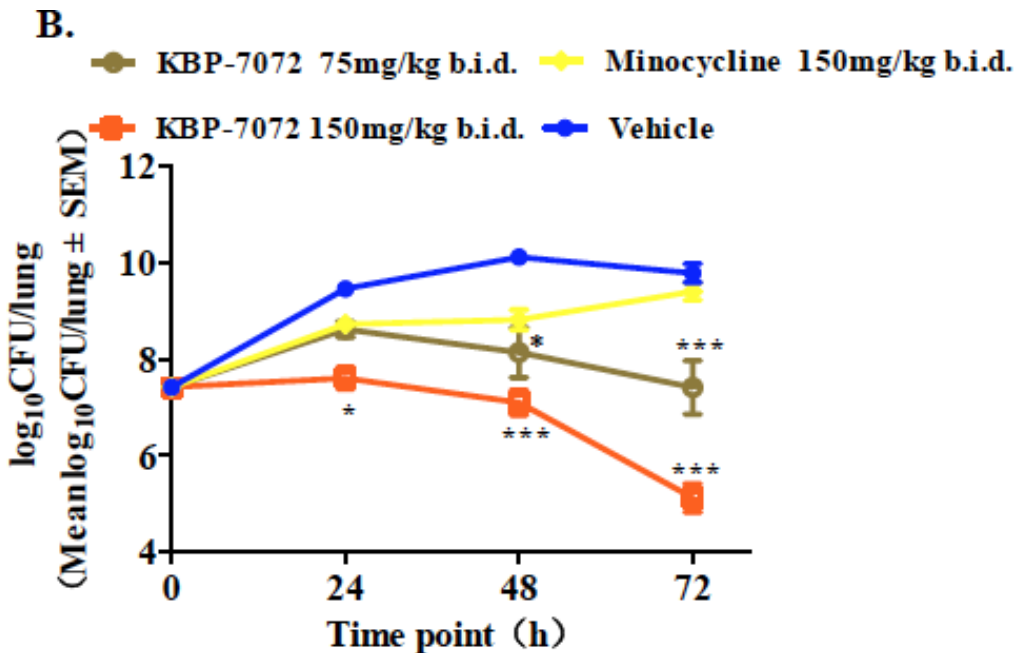

377

378 Figure 2. Survival of experimental animals. Log Rank Test was used to analyze survival rate.

379 (\*  $p < 0.05$ ; \*\*  $p < 0.01$ ; \*\*\*  $p < 0.001$ ).

380

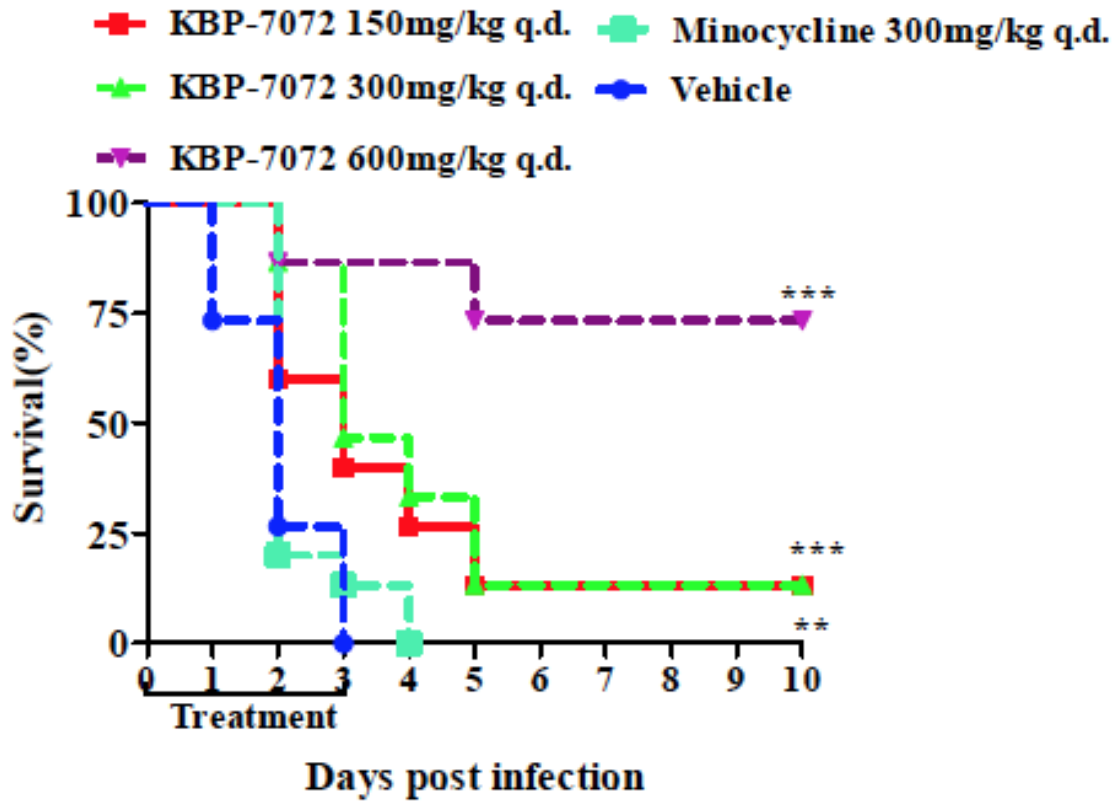

381

382 Figure 3. Efficacy of KBP-7072 in mouse pneumonia model infected by intranasal inoculation of  
383 *Streptococcus pneumoniae*. A. Colony forming unit in animals treated by KBP-7072 dosed once  
384 daily. B. Colony forming unit in animals treated by KBP-7072 dosed twice daily. (\* p<0.05; \*\*  
385 p< 0.01; \*\*\* p<0.001).

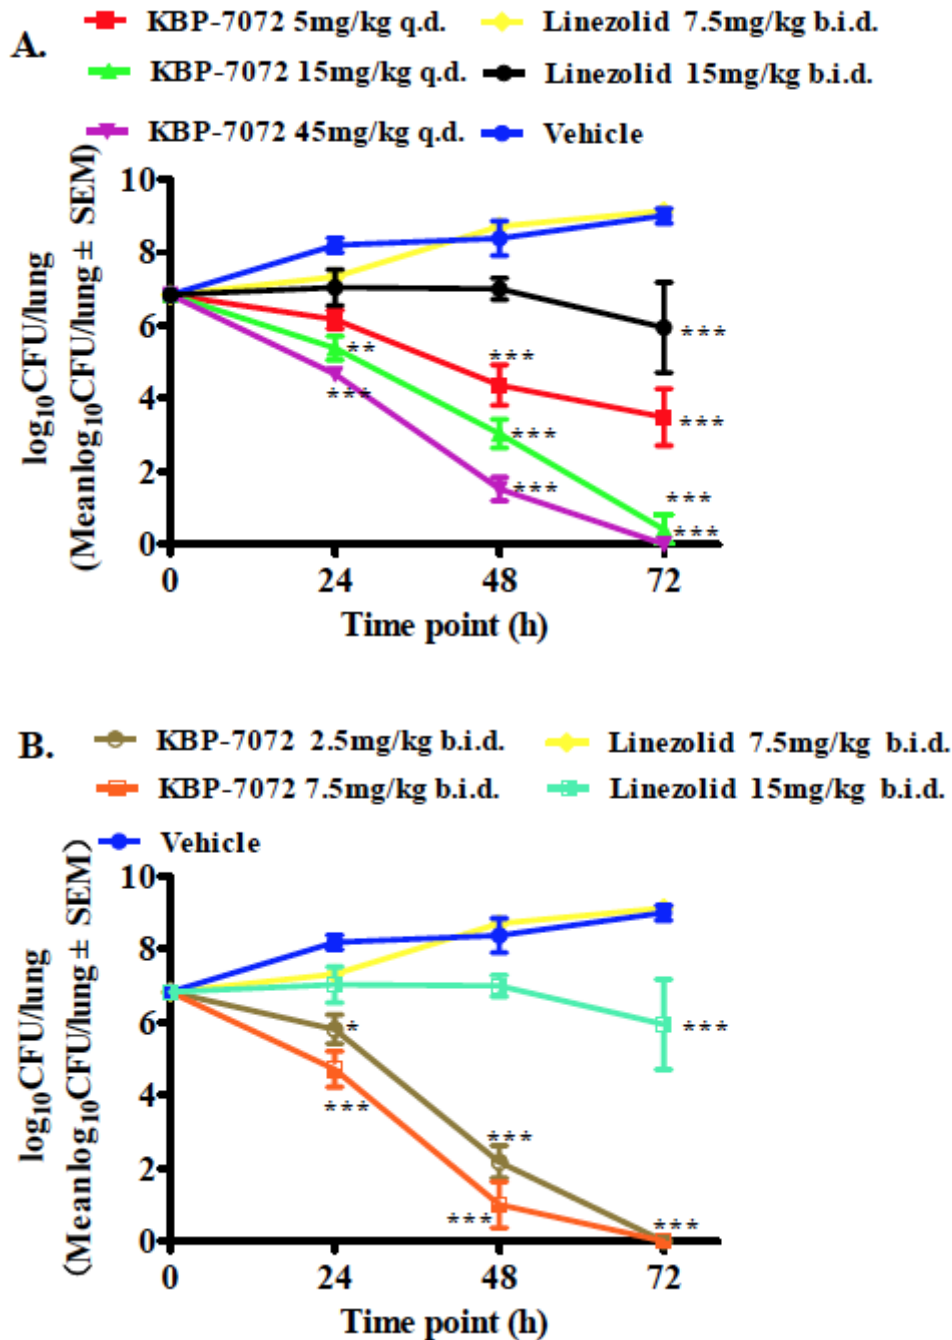

386

387 Figure 4. Survival of experimental animals. Log Rank Test was used to analyze survival rate.

388 (\*  $p < 0.05$ ; \*\*  $p < 0.01$ ; \*\*\*  $p < 0.001$ ).

389

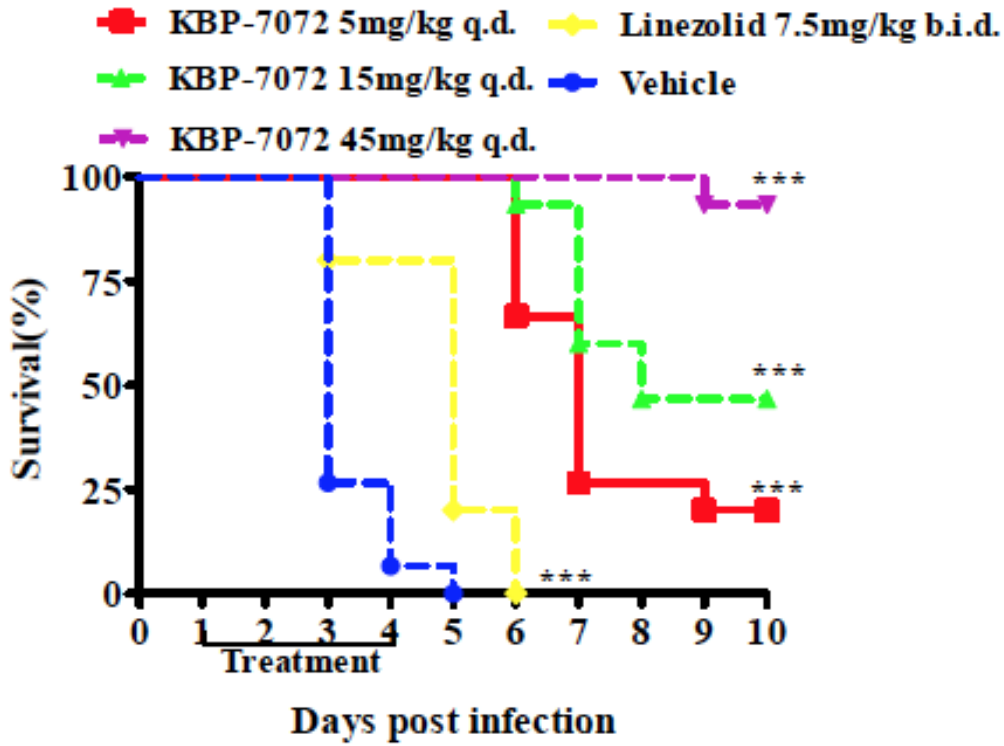

390

391 Figure 5. Relationship between the  $\log_{10}$  CFU change and the PK/PD parameters 24-h  
392  $fAUC/MIC$  (a),  $fC_{max}/MIC$  (b) and  $\%T > MIC_{free}$  (c) in KBP-7072-treated methicillin-resistant  
393 *Staphylococcus aureus* 6424MRSA-363-induced thigh infection model. ( $fAUC/MIC$  Parameter:  
394  $E_{max}=4.2851363$ ,  $EC_{50}=3.9220294$ ,  $E_0=2.6738137$ ,  $N=1.7180344$ ).

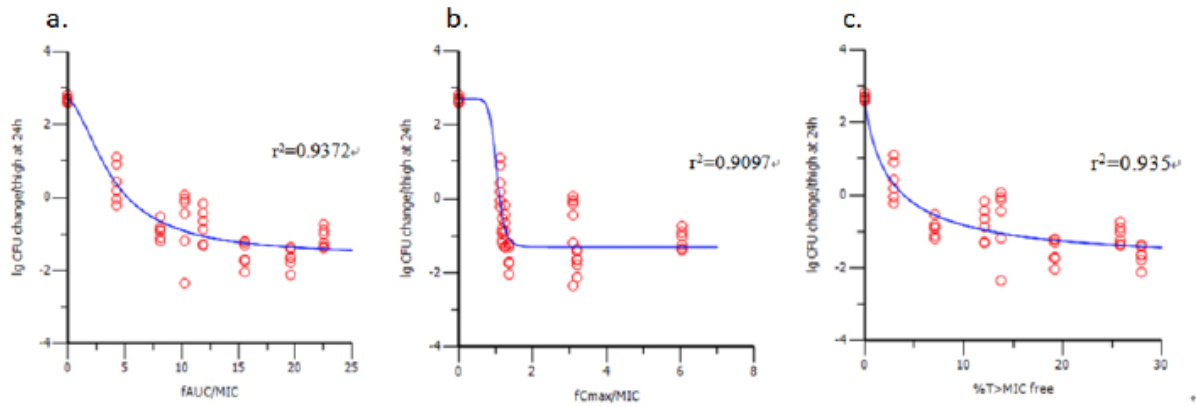

395

396 Figure 6. Relationship between the log<sub>10</sub> CFU change and the PK/PD parameters 24-h  
397  $fAUC/MIC$  (a),  $fC_{max}/MIC$  (b) and  $\%T > MIC_{free}$  (c) in KBP-7072-treated *Klebsiella pneumoniae*  
398 6680kpn-522-induced thigh infection model. ( $fAUC/MIC$  Parameter:  $E_{max}=9.4409802$ ,  
399  $EC_{50}=8.2909711$ ,  $E_0=3.8799326$ ,  $N=0.72923001$ ).

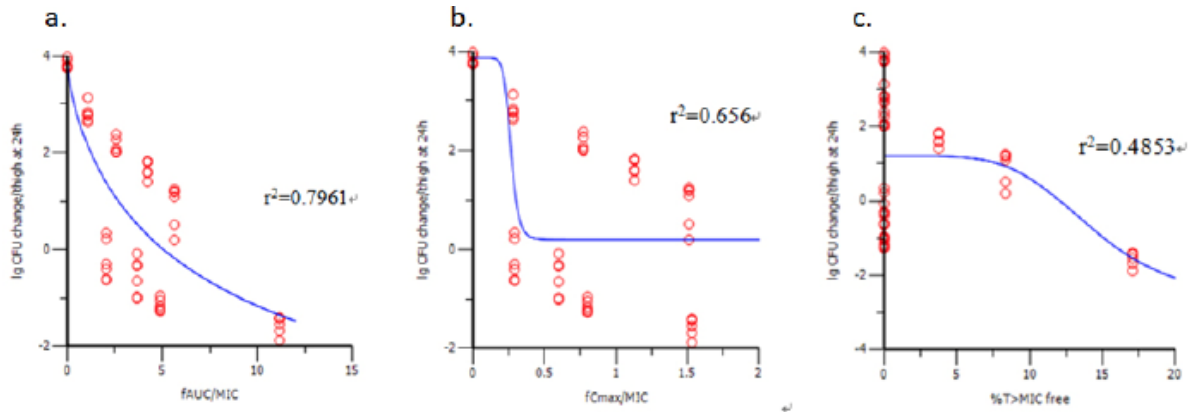

400

401 Figure 7. Relationship between the log<sub>10</sub> CFU change and the PK/PD parameters 24-h  
402 *fAUC/MIC* (a) and *fCmax/MIC* (b) in KBP-7072-treated *Escherichia coli* 6691eco-558-induced  
403 thigh infection model. (*fAUC/MIC* Parameter:  $E_{max}=6.0756719$ ,  $EC_{50}=2.4501195$ ,  
404  $E_0=3.3397329$ ,  $N=1.3692287$ ).

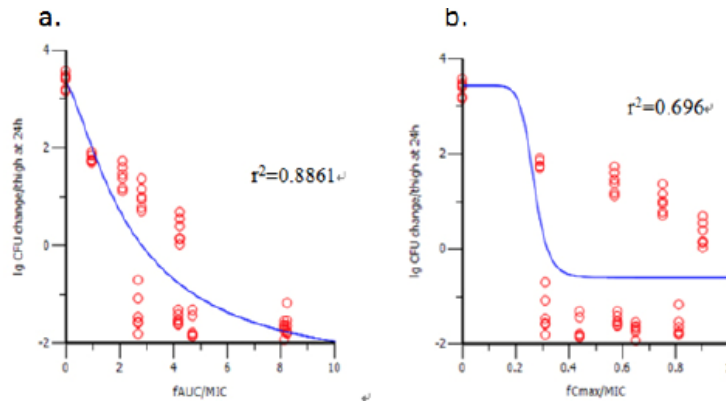

405



406 Table 1. Mean  $\pm$  standard deviation CFU at 24, 48, and 72 hours post dose of drug or vehicle in  
 407 the *K. pneumoniae* and *S. pneumoniae* models.

| <b><i>K. pneumoniae</i> Model</b> |                 |                  |                 |
|-----------------------------------|-----------------|------------------|-----------------|
| Treatment Group                   | 24 hours        | 48 hours         | 72 hours        |
| KBP-7072 150 mg/kg qd             | 8.60 $\pm$ 0.56 | 9.14 $\pm$ 1.02  | 8.00 $\pm$ 1.72 |
| KBP-7072 300 mg/kg qd             | 8.69 $\pm$ 0.51 | 8.44 $\pm$ 1.11  | 7.64 $\pm$ 1.31 |
| KBP-7072 600 mg/kg qd             | 7.78 $\pm$ 0.50 | 6.38 $\pm$ 1.22  | 5.18 $\pm$ 0.66 |
| KBP-7072 75 mg/kg BID             | 8.62 $\pm$ 0.39 | 8.14 $\pm$ 1.16  | 7.42 $\pm$ 1.25 |
| KBP-7072 150 mg/kg BID            | 7.61 $\pm$ 0.55 | 7.11 $\pm$ 0.64  | 5.12 $\pm$ 0.73 |
| Minocycline 300 mg/kg qd          | 8.99 $\pm$ 0.13 | 9.26 $\pm$ 0.55  | 9.43 $\pm$ 0.48 |
| Minocycline 150 mg/kg BID         | 8.73 $\pm$ 0.35 | 8.82 $\pm$ 0.51  | 9.41 $\pm$ 0.43 |
| Vehicle                           | 9.46 $\pm$ 0.24 | 10.13 $\pm$ 0.09 | 9.79 $\pm$ 0.48 |
| <b><i>S. pneumoniae</i> Model</b> |                 |                  |                 |
| Treatment Group                   | 24 hours        | 48 hours         | 72 hours        |
| KBP-7072 5 mg/kg qd               | 6.16 $\pm$ 0.63 | 4.35 $\pm$ 1.37  | 3.49 $\pm$ 1.90 |
| KBP-7072 15 mg/kg qd              | 5.37 $\pm$ 0.72 | 3.03 $\pm$ 0.88  | 0.40 $\pm$ 0.98 |
| KBP-7072 45 mg/kg qd              | 4.66 $\pm$ 0.28 | 1.52 $\pm$ 0.78  | 0 $\pm$ 0       |
| KBP-7072 2.5 mg/kg BID            | 5.81 $\pm$ 0.98 | 2.17 $\pm$ 1.10  | 0 $\pm$ 0       |
| KBP-7072 7.5 mg/kg BID            | 4.71 $\pm$ 1.19 | 1.00 $\pm$ 1.55  | 0 $\pm$ 0       |
| Linezolid 7.5 mg/kg BID           | 7.32 $\pm$ 0.43 | 8.70 $\pm$ 0.47  | 9.12 $\pm$ 0.17 |
| Linezolid 15 mg/kg BID            | 7.03 $\pm$ 1.21 | 7.00 $\pm$ 0.72  | 5.94 $\pm$ 3.02 |
| Vehicle                           | 8.19 $\pm$ 0.49 | 8.38 $\pm$ 1.16  | 8.99 $\pm$ 0.50 |

408

409 Table 2. Efficacy of KBP-7072 in *Staphylococcus Aureus* 6424MRSA-363-Induced Murine  
 410 Thigh Infection Model.

| Dose (mg/kg) | Schedule | Inoculation Concentration (log <sub>10</sub> CFU/thigh) | 0 h-Control log <sub>10</sub> CFU/thigh Mean ± SD | 24 h log <sub>10</sub> CFU/thigh Mean ± SD | % Reduction * | p-value* * |   |
|--------------|----------|---------------------------------------------------------|---------------------------------------------------|--------------------------------------------|---------------|------------|---|
| 10           | qd       | 5.79                                                    | 6.41±0.09                                         | 6.80±0.53                                  | 25.1          | <0.001     |   |
|              | bid      |                                                         |                                                   | 5.50 ±0.23                                 | 39.4          | <0.001     |   |
|              | tid      |                                                         |                                                   | 5.62±0.46                                  | 38.1          | <0.001     |   |
|              | qid      |                                                         |                                                   | 4.88 ±0.34                                 | 46.3          | <0.001     |   |
| 20           | qd       |                                                         |                                                   | 5.73 ±0.93                                 | 36.9          | <0.001     |   |
|              | bid      |                                                         |                                                   | 4.75±0.27                                  | 47.7          | <0.001     |   |
| 40           | qd       |                                                         |                                                   | 5.31±0.26                                  | 41.6          | <0.001     |   |
| Vehicle      | qd       |                                                         |                                                   |                                            | 9.08±0.08     | 0          | - |

411 \* % Reduction = [1-(Log<sub>10</sub>CFU/thing treated ÷ Log<sub>10</sub>CFU/thing vehicle)]×100

412 \*\* Data analyzed by one-way analysis of variance followed by Tukey test

413 CFU = colony forming unit; SD = standard deviation

414 Table 3. Activity of KBP-7072 in a *Klebsiella Pneumoniae* 6680kpn-522-Induced Murine Thigh  
 415 Infection Model.

| Dose (mg/kg) | Schedule | Inoculation Concentration (log <sub>10</sub> CFU/thigh) | 0 h-Control log <sub>10</sub> CFU/thigh Mean ± SD | 24 h log <sub>10</sub> CFU/thigh Mean ± SD | % Reduction* | p-value**  |   |   |
|--------------|----------|---------------------------------------------------------|---------------------------------------------------|--------------------------------------------|--------------|------------|---|---|
| 10           | qd       | 5.76                                                    | 6.60±0.09                                         | 9.40±0.18                                  | 9.8          | <0.001     |   |   |
|              | bid      |                                                         |                                                   | 6.37±0.41                                  | 38.9         | <0.001     |   |   |
| 15           | bid      |                                                         |                                                   | 6.04±0.38                                  | 42.1         | <0.001     |   |   |
| 20           | qd       |                                                         |                                                   | 8.73±0.16                                  | 16.3         | <0.001     |   |   |
|              | bid      |                                                         |                                                   | 5.45±0.12                                  | 47.7         | <0.001     |   |   |
| 30           | qd       |                                                         |                                                   | 8.27±0.17                                  | 20.7         | <0.001     |   |   |
| 40           | qd       |                                                         |                                                   | 7.51±0.44                                  | 28.0         | <0.001     |   |   |
|              | bid      |                                                         |                                                   | 5.04±0.19                                  | 51.7         | <0.001     |   |   |
| Vehicle      | qd       |                                                         |                                                   |                                            |              | 10.43±0.09 | 0 | - |

416 \* % Reduction = [1-(Log<sub>10</sub>CFU/thing treated ÷ Log<sub>10</sub>CFU/thing vehicle)]×100

417 \*\* Data analyzed by one-way analysis of variance followed by Tukey test

418 CFU = colony forming unit; SD = standard deviation

419 Table 4. Efficacy of KBP-7072 in *Escherichia Coli* 6691eco-558-induced Murine Thigh  
 420 Infection Model.

| Dose (mg/kg) | Schedule | Inoculation Concentration (log <sub>10</sub> CFU/thigh) | 0 h-Control log <sub>10</sub> CFU/thigh Mean ± SD | 24 h log <sub>10</sub> CFU/thigh Mean ± SD | % Reduction* | <i>p</i> Value** |   |   |
|--------------|----------|---------------------------------------------------------|---------------------------------------------------|--------------------------------------------|--------------|------------------|---|---|
| 15           | qd       | 6.06                                                    | 6.67±0.03                                         | 8.45±0.08                                  | 15.9         | <0.001           |   |   |
|              | tid      |                                                         |                                                   | 5.31±0.40                                  | 47.2         | <0.001           |   |   |
| 20           | qid      |                                                         |                                                   | 5.00±0.24                                  | 50.3         | <0.001           |   |   |
| 30           | qd       |                                                         |                                                   | 8.08±0.24                                  | 19.6         | <0.001           |   |   |
|              | bid      |                                                         |                                                   | 5.17±0.11                                  | 48.5         | <0.001           |   |   |
|              | qid      |                                                         |                                                   | 4.98±0.13                                  | 50.5         | <0.001           |   |   |
| 40           | qd       |                                                         |                                                   | 7.66±0.24                                  | 23.7         | <0.001           |   |   |
|              | tid      |                                                         |                                                   | 5.06±0.24                                  | 49.6         | <0.001           |   |   |
| 50           | qd       |                                                         |                                                   | 7.00±0.26                                  | 30.4         | <0.001           |   |   |
| Vehicle      | qd       |                                                         |                                                   |                                            |              | 10.05±0.16       | 0 | - |

421 \* % Reduction= [1-(Log<sub>10</sub>CFU/thing treated ÷ Log<sub>10</sub>CFU/thing vehicle)]×100

422 \*\*Data analyzed by one-way analysis of variance followed by Tukey test

423 CFU = colony forming unit; SD = standard deviation

424 Table 5. Relationship Between KBP-7072 MIC and  $fAUC/MIC$  Necessary for Achieving a Static  
425 Effect and 1  $\log_{10}$  and 2  $\log_{10}$  Killing.

| Isolate                        | MIC ( $\mu\text{g/mL}$ ) | $fAUC/MIC$    |                    |                    |
|--------------------------------|--------------------------|---------------|--------------------|--------------------|
|                                |                          | static effect | 1 $\log_{10}$ kill | 2 $\log_{10}$ kill |
| 6424MRSA-363                   | 0.25                     | 5.27          | 11.14              | NA*                |
| 6680 <i>K. pneumoniae</i> -522 | 1                        | 5.06          | 9.10               | 16.49              |
| 6691 <i>E. coli</i> -558       | 2                        | 2.83          | 4.78               | 10.42              |
| Mean                           | /                        | 4.39          | 8.34               | 13.46              |

426 \*NA: 2  $\log_{10}$ kill was achieved.

427 Table 6. PK/PD Parameters\* of KBP-7072 in *Staphylococcus aureus* (No: 6424MRSA-363)-  
428 induced Murine Thigh Infection Model.

| Dose (mg/kg) | Interval | $fAUC/MIC^*$ | $fC_{max}/MIC^*$ | $\%T > MIC_{free}^*$ |
|--------------|----------|--------------|------------------|----------------------|
| 10           | qd       | 4.28         | 1.12             | 2.92                 |
|              | bid      | 8.15         | 1.17             | 7.08                 |
|              | tid      | 11.89        | 1.25             | 12.08                |
|              | qid      | 15.55        | 1.36             | 19.17                |
| 20           | qd       | 10.26        | 3.09             | 13.75                |
|              | bid      | 19.58        | 3.20             | 27.92                |
| 40           | qd       | 22.50        | 6.04             | 25.83                |

429 \* PK/PD parameters were calculated using WinNonlin Phoenix 6.1.0 software with the MIC  
430 value, PK, and plasma protein binding data.

431 Table 7. PK/PD Parameters\* of KBP-7072 in *Klebsiella pneumoniae* (No: 6680kpn-522) in a  
432 Murine Thigh Infection Model.

| Dose (mg/kg)    | Interval | $fAUC/MIC^a$ | $fC_{max}/MIC^a$ | % T>MIC <sub>free</sub> <sup>a</sup> |
|-----------------|----------|--------------|------------------|--------------------------------------|
| 10              | qd       | 1.07         | 0.28             | 0.00                                 |
|                 | bid      | 2.04         | 0.29             | 0.00                                 |
| 15 <sup>b</sup> | bid      | 3.67         | 0.60             | 0.00                                 |
| 20              | qd       | 2.56         | 0.77             | 0.00                                 |
|                 | bid      | 4.89         | 0.80             | 0.00                                 |
| 30 <sup>c</sup> | qd       | 4.22         | 1.13             | 3.75                                 |
| 40              | qd       | 5.62         | 1.51             | 8.33                                 |
|                 | bid      | 11.15        | 1.53             | 17.08                                |

433 <sup>a</sup> PK/PD parameters were calculated using WinNonlin Phoenix 6.1.0 software with the MIC  
434 value, PK, and plasma protein binding data.

435 <sup>b, c</sup> The PK parameter of KBP-7072 after single dose subcutaneous administration was linear.

436 The PK/PD parameter for dose 15 mg/kg and 30 mg/kg was calculated using the PK data of 20  
437 mg/kg and 40 mg/kg, respectively.

438 Table 8. PK/PD Parameters of KBP-7072 Against *Escherichia coli* (No: 6691eco-558) in a  
 439 Murine Thigh Infection Model.

| Dose (mg/kg)    | Interval | $fAUC/MIC^a$ | $fC_{max}/MIC^a$ | $\%T > MIC_{free}^a$ |
|-----------------|----------|--------------|------------------|----------------------|
| 15 <sup>b</sup> | qd       | 0.96         | 0.29             | 0.00                 |
|                 | tid      | 2.69         | 0.31             | 0.00                 |
| 20              | qid      | 4.71         | 0.44             | 0.00                 |
| 30 <sup>c</sup> | qd       | 2.11         | 0.57             | 0.00                 |
|                 | bid      | 4.18         | 0.58             | 0.00                 |
|                 | qid      | 8.11         | 0.65             | 0.00                 |
| 40              | qd       | 2.81         | 0.75             | 0.00                 |
|                 | tid      | 8.23         | 0.81             | 0.00                 |
| 50 <sup>d</sup> | qd       | 4.23         | 0.90             | 0.00                 |

440 <sup>a</sup> PK/PD parameters were calculated using WinNonlin Phoenix 6.1.0 software with the MIC  
 441 value, PK, and plasma protein binding data.

442 <sup>b, c, d</sup> The PK parameter of KBP-7072 after single dose subcutaneous administration was linear.

443 The PK/PD parameter for dose 15 mg/kg, 30 mg/kg, and 50 mg/kg was calculated using the PK

444 data of 20 mg/kg, 40 mg/kg, and 60 mg/kg, respectively.
